# Supplementary material for: HMGB1-mediated autophagy decreases sensitivity to oxymatrine in SW982 human synovial sarcoma cells
Source: PubMed Central journal article supplement (PMC5126735; doi:10.1038/srep37845), 2016-11-29

HMGB1-mediated autophagy decreases sensitivity to oxymatrine in  
SW982 human synovial sarcoma cells

Yongsong Cai<sup>1</sup>, Peng Xu<sup>2,\*</sup>, Le Yang<sup>2</sup>, Ke Xu<sup>2</sup>, Jialin Zhu<sup>2</sup>, Xiaoqing Wu<sup>2</sup>,  
Congshan Jiang<sup>3</sup>, Qiling Yuan<sup>1</sup>, Bo Wang<sup>4</sup>, Yuanbo Li<sup>2</sup> & Yusheng Qiu<sup>1,\*</sup>

<sup>1</sup>Department of Orthopaedics of the First Affiliated Hospital, Xi'an  
Jiaotong University Health Science Center, Xi'an, 710061, China;

<sup>2</sup>Department of Joint Surgery, Xi'an Hong Hui Hospital, Xi'an Jiaotong  
University Health Science Center, Xi'an, 710054, China;

<sup>3</sup>Department of Biochemistry and Molecular Biology, School of Basic  
Medical Sciences, Xi'an Jiaotong University Health Science Center,  
Xi'an, 710061, China;

<sup>4</sup>Center for Translational Medicine, the First Affiliated Hospital of Xi'an  
Jiaotong University Health Science Center, Xi'an, 710061, China;

\*Correspondence should be addressed to Peng Xu; [sousou369@163.com](mailto:sousou369@163.com);  
Yusheng Qiu; [yusheng.qiu@mail.xjtu.edu.cn](mailto:yusheng.qiu@mail.xjtu.edu.cn)

## Supplementary figure legend:

Supplementary Figure S1: Detection of autophagic flux. Cells were treated with 2 mM OMT for 48 h in the presence or absence of 100 nM Baf A1 (a) or E64d/pepstatin A (10 $\mu$ g/ml E64d and 10 $\mu$ g/ml pepstatin A) (b). The expression of LC3 was detected by western blotting and relative densitometric analyses (a and b). Loading control was performed by evaluating  $\beta$ -actin expression in the same filter. The LC3-II/LC3-I ratios from 3 independent experiments are expressed as the mean  $\pm$  SD. The data were analyzed using Student's t-test. \* $p < 0.05$ , \*\* $p < 0.01$ , \*\*\* $p < 0.001$ .

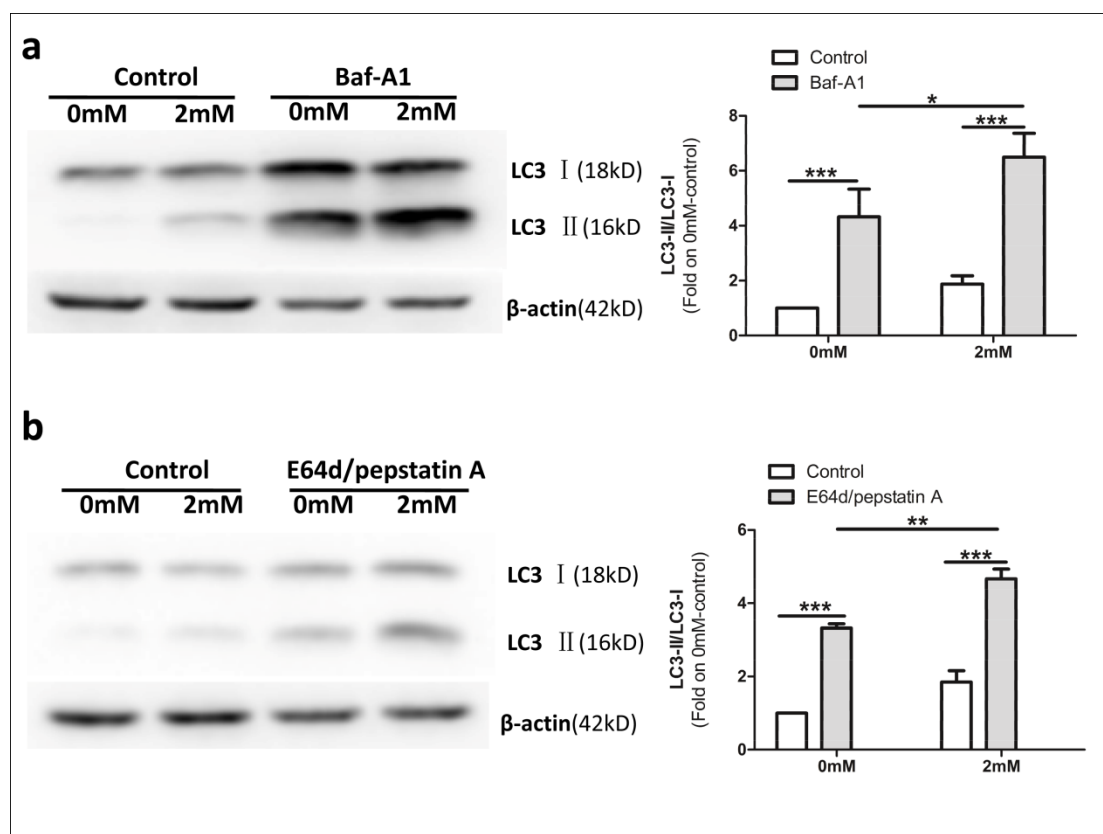

Supplementary Figure S2: The expression of p62 in SW982 cells treated with OMT. Cells were treated with the indicated concentrations of OMT for 48 h (a) or 2 mM OMT for the indicated times (b), and the expression of p62 was detected by western blotting and relative densitometric analyses (a and b). Loading control was performed by evaluating  $\beta$ -actin expression in the same filter. The results are representative of 3 independent experiments and are expressed as the mean  $\pm$  SD. The data were analyzed using Student's t-test. All  $p > 0.05$ , compared with the control (0 mM or 0 h).

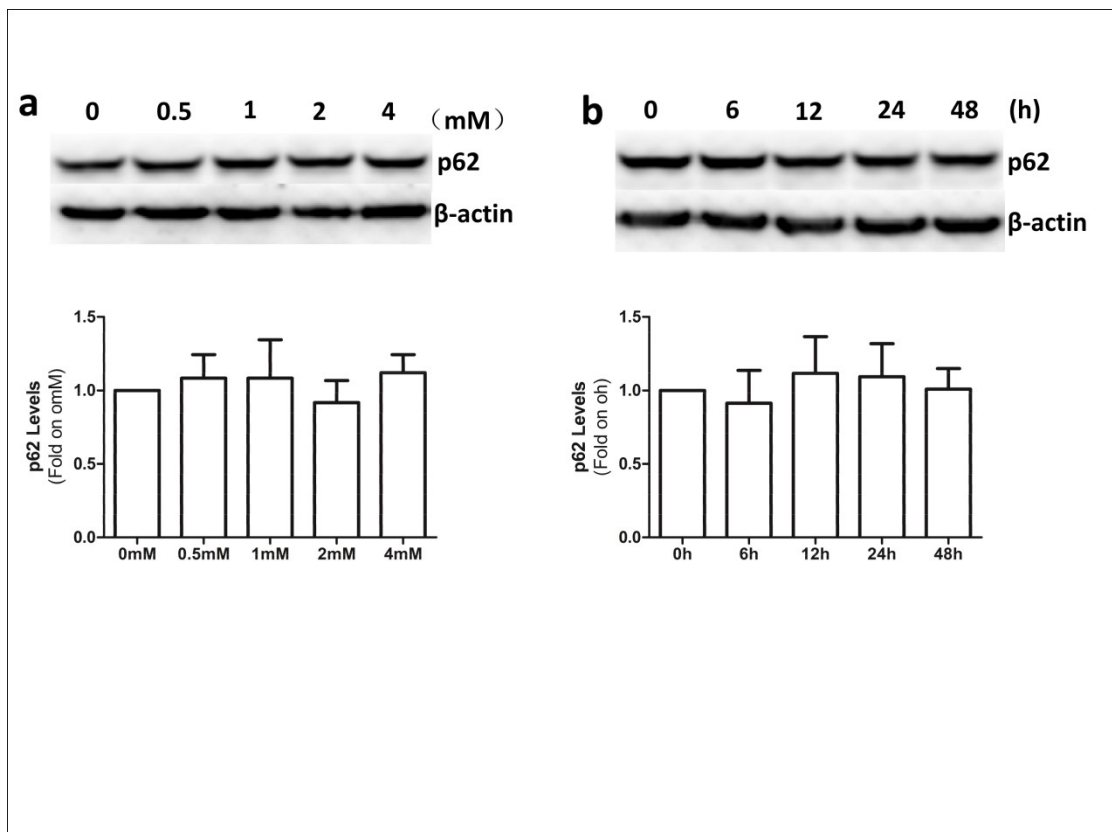

Supplementary Figure S3: Cells were treated with the indicated concentrations of OMT for 48 h (a) or 2 mM OMT for the indicated times (b), and the expression of LC3 was detected by western blotting (cells were seeded in 6-well plate and two wells of cells were treated with 4mM OMT for 48 h (a). In figure b, two wells of cells were treated for 48 h).

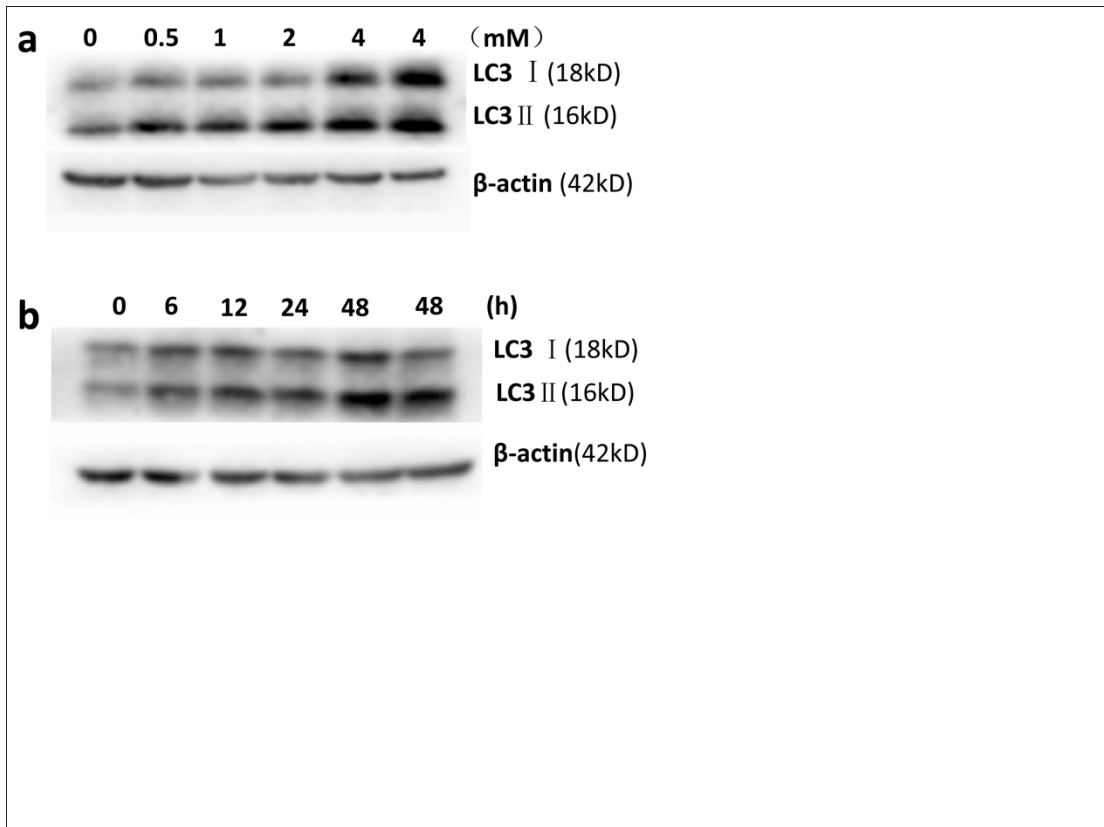

Supplement: srep37845-s1.pdf [file srep37845-s1.pdf]
